# Supplementary material
Source: publisher figshare collection journal article supplement (https://brill.figshare.com/articles/dataset/_/4753600)
Supplement: Supplementary file 1 [file 1]

**Table A1.** Overview of taxa studied

| Taxon | No. of specimen | Country | Locality | Coordinates | Date | Legitis | Det. | Mode of examination |
| --- | --- | --- | --- | --- | --- | --- | --- | --- |
| *Acanthoscelio* sp. 1 | 2♀ and 2♂ | Paraguay | Concepción Estancia Don Carlos | 23°24’ S, 56°30’ W | 17–18 December 2004 | B. Garcete | N. Johnson (2008) | Microscopic slide (light microscopy) |
| *Acanthoscelio* sp. 2 | 1♀ | Bolivia | Cochabamba Villa Tunari | 16°54’ 55”S, 65°22’ 06”W | ? September 2001 | H. Heider | L. Masner (2008) | Microscopic slide (light microscopy) |
| *Acanthoscelio* sp. 2 | 1♂ and 1♀ | French Guyana | Roura Montagne de Chevaux | ? | 1–31 October 2009 | V. Soon | O. Popovici (2014) | SEM |
| *Acolomorpha* sp. | 1♀ | Australia | QLD, Mossman Gorge Nat. Park. | 16°28’ 07”S, 145°19’ 44”E | 18–21 September 2004 | L. Masner | L. Masner (2008) | Microscopic slide (light microscopy) |
| *Amblyscelio* sp. 1 | 1♀ | South Africa | Gauteng 5,6 km W of M17 on Hwy 513 Schoeman Farm | 25°40’ S, 28°00’ E | 4–23 December 1999 | T.K. Philips | N. Johnson (2009) | Microscopic slide (light microscopy) |
| *Amblyscelio* sp. 2 | 1♂ and 1♀ | Greece | Kerkini lake Nat. Park | 41º19’ 30.5”N, 23º15’ 0.1”E | 15 September –21 September 2008 | G. Ramel | O. Popovici (2010) | Microscopic slide (light microscopy) |
| *Anteris* sp. 1 | 1♀ | W. Germany | Rheinland, mechernich wadendorf |  | 17 April –31 May 1977 | M. Baness | L. Masner (2008) | Microscopic slide (light microscopy) |
| *Anteris* sp. 1 | 3♀ | Romania | Botoșani: Leorda | 47°49’ 25,31”N, 26°24’ 28.39”E | 1 May 2005 | O. Popovici | O. Popovici (2008) | Microscopic slide (light microscopy) |
| *Anteris* sp. 1 | 1♂ and 1♀ | Romania | Iași: Bârnova | 46°59’ 06.6”N, 27°35’ 04.5”E | 17 August 2004 | O. Popovici | O. Popovici (2008) | Microscopic slide (light microscopy) |
| *Anteris* sp. 2 | 6♂ | Romania | Iași: Bârnova | 46°59’ 06.6”N, 27°35’ 04.5”E | 15 July 2006 | O. Popovici and C. Ailenei | O. Popovici (2008) | Microscopic slide (light microscopy) |
| *Anteris* sp. 2 | 3♂ | Romania | Botoșani: Leorda | 47°49’ 25,31”N, 26°24’ 28.39”E | 10 June 2004 | O. Popovici | O. Popovici (2008) | Microscopic slide (light microscopy) |
| *Anteris* sp. 2 | 1♂ | Romania | Botoșani: Popeni | 47°50’ 10.12”N, 26°30’ 35.24”E | 17 July 2002 | O. Popovici | O. Popovici (2008) | Microscopic slide (light microscopy) |
| *Anteris* sp. 2 | 1♂ and 1♀ | Romania | Iași: Bârnova | 46°59’ 06.6”N, 27°35’ 04.5”E | 15 July 2006 | O. Popovici and C. Ailenei | O. Popovici (2008) | Microscopic slide (light microscopy) |
| *Anteris* sp. 2 | 2♂ | France | Malboisset, Larche, Alpes de Haute Provence | 44°26’ N, 6°51’ E | 19–22 July 2011 | T. Yoshida | O. Popovici (2014) | SEM |
| *Anthonyon* sp. 1 | 1♀ | Kenya | Rift Valley Marich Pass | 1°32.18’ N, 35°27.48’ E | 6–20 February 2005 |  | L. Masner (2009) | Microscopic slide (light microscopy) |
| *Anthonyon* sp. 1 | 1♀ | Bostwana | Xugana |  | ? December 1979 | Wilmot | L. Masner (2014) | SEM |
| *Apegus* sp. 1 | 8♀ | Romania | Iași: Bârnova | 46°59’ 06.6”N, 27°35’ 04.5”E | 21–22 June 2007 | O. Popovici and L. Fusu | O. Popovici (2008) | Microscopic slide (light microscopy) |
| *Apegus* sp. 2 | 2♂ | Slovakia | Muronska Planina Nat Park | 48°76’ 41.05”N, 20°10’ 41.05”E | 25–31 July 2009 | Mitroiu M. | O. Popovici (2014) | SEM |
| *Apegus* sp. 2 | 1♂ | Turkey | Genya Dagi, 6.3 km SW of Artvin | 41°08.12’ N, 41°46.75’ E | 25 June 2008 | M. v. Tschirnhaus | O. Popovici (2014) | SEM |
| *Apteroscelio* sp. 1 | 1♀ | Kenya | Nairobi environs | 1°23.01’ S, 36°85.13’ E | ? April 2002 | S. Kimani | L. Masner (2008) | Microscopic slide (light microscopy) |
| *Apteroscelio* sp. 2 | 2♀ | Madagascar | Andasibe National Center and forest station | 18°56.10’ S, 48°24,51’ E | 20 September 2004 | M. v. Tschirnhaus | O. Popovici (2014) | SEM |
| *Aradophagus fasciatus* Ashmead | 1♀ | Osuc 0176055 |  |  |  |  | N. Johnson (2009) | Microscopic slide (light microscopy) |
| *Aradophagus fasciatus* Ashmead | 1♀ | Greece | Kerkini lake Nat. Park | 41°22’ 38,1”N, 23°21’ 58,8”E | 19 September –25 September 2007 | G. Ramel | O. Popovici (2008) | Microscopic slide (light microscopy) |
| *Aradophagus fasciatus* Ashmead | 1♂ | Greece | Kerkini lake Nat. Park | 41°9’ 6,5”N, 23°11’ 55,0”E | 6 June –12 June 2005 | G. Ramel | O. Popovici (2008) | Microscopic slide (light microscopy) |
| *Aradophagus fasciatus* Ashmead | 1♂ | Greece | Kerkini lake Nat. Park | 41°12’ 48,7”N, 23°06’ 11,9”E | 9 May –15 May 2007 | G. Ramel | O. Popovici (2008) | Microscopic slide (light microscopy) |
| *Aradophagus fasciatus* Ashmead | 1♀ | Romania | Constanţa: Agigea | 44°5’ 11.1”N, 28°38’ 31.0”E | 13 July 2006 | L. Fusu and I. Popescu | O. Popovici (2006) | Microscopic slide (light microscopy) |
| *Aradophagus fasciatus* Ashmead | 1♀ | France | Cirad Montpellier Bord du Lez |  | 17 July 1986 | H.P. Aberlenc | O. Popovici (2014) | SEM |
| *Aradophagus* sp. 1 | 1♀ | Madagascar | Island Nosi, Tanikely (East of Nosi Be) | 13°28,59’ S, 48°14,18’ E | 11 September 2004 | M. v. Tschirnhaus | O. Popovici (2014) | SEM |
| *Archaeoteleia mellea* Masner | 1♀ | Chile | Chiloe Is, 50m Terao nr. Chonchi |  | 21–23 February 1988 | L. Masner | L. Masner (2008) | Microscopic slide (light microscopy) |
| *Archaeoteleia* sp. 1 | 1♂ | Chile | Osorno, Puyehue NP Anticura | 40.67°S, 72°17W | 20–23 January 2007 | Brown, Berezovskiy and Zumbado | O. Popovici (2014) | SEM |
| *Axea* sp. 1 | 1♂ and 1♀ | Kenya | Marich Pass |  | 24 July –7 August 2005 |  | N. Johnson (2010) | Microscopic slide (light microscopy) |
| *Axea* sp. 2 | 2♀ | Togo | River Mono, 5 km SSE Ahassome, 22,5 km NW Tohuan | 7°11’ 12”N, 1°28’ 54”E | 7 April 2008 | M. v. Tschirnhaus | O. Popovici (2014) | SEM |
| Genus A | 1♀ | French Guyana | Kaw Mountains | 4º33,562’ N, 52º12,425’ W | 30 July –17 August 2006 | K. Sarv | L. Masner and O. Popovici (2014) | SEM |
| *Baeus* sp. 1 | 3♀ | Romania | Iași: Bârnova | 46°59’ 37.0”N, 27°35’ 27.1”E | 15 July 2006 | O. Popovici and C. Ailenei | O. Popovici (2008) | Microscopic slide (light microscopy) |
| *Baeus* sp. 1 | 5♀ | Romania | Iași: Bârnova | 46°59’ 37.0”N, 27°35’ 27.1”E | 8 September 2004 | O. Popovici | O. Popovici (2008) | Microscopic slide (light microscopy) |
| *Baeus* sp. 1 | 1♂ | Romania | Suceava: Fălticeni |  | 10 July 2002 | O. Popovici | O. Popovici (2008) | Microscopic slide (light microscopy) |
| *Baeus* sp. 1 | 1♂ | Romania | Iași: Valea lui David | 47°11’ 34.58”N, 27°28’ 05.55”E | 2 October 1999 | L. Fusu | O. Popovici (2008) | Microscopic slide (light microscopy) |
| *Baeus* sp. 1 | 1♂ | Romania | Iași: Breazu |  | 3 August 2001 | O. Popovici | O. Popovici (2008) | Microscopic slide (light microscopy) |
| *Baeus* sp. 1 | 1♂ | Romania | Suceava: Fălticeni |  | 26 August 2003 | O. Popovici | O. Popovici (2008) | Microscopic slide (light microscopy) |
| *Baeus* sp. 2 | 10♀ | Romania | Iași: Bârnova | 46°59’ 37.0”N, 27°35’ 27.1”E | 15 July 2006 | O. Popovici and C. Ailenei | O. Popovici (2008) | Microscopic slide (light microscopy) |
| *Baeus* sp. 2 | 2♀ | Romania | Iași: Ciric Lake |  | 4 September 2007 | O. Popovici | O. Popovici (2014) | SEM |
| *Baryconus* sp. 1 | 1♀ | Brasil | PA, Melgaco, Caxiuană Trilha Igarapé Curuá | 1°42’ 50.2”S 51°27’ 11.4”W | 20–23 November 2003 | A.P. Aguiar and J. Dias | N. Johnson (2008) | Microscopic slide (light microscopy) |
| *Baryconus* sp. 2 | 2♀ | Panama | wooley 2001/028 |  |  |  |  | Microscopic slide (light microscopy) |
| *Bracalba* sp. 1 | 2♂ | Australia | Scrub, Fleurier Peninsula | 35°20’ S,138°45’ E | 6 February –8 March 1999 | A. Austin | S. Thompson (2009) | Microscopic slide (light microscopy) |
| *Bracalba* sp. 1 | 1♂ | Australia | Scrub, Fleurier Peninsula | 35°20’ S,138°45’ E | 6 February –8 March 1999 | A. Austin | S. Thompson (2009) | SEM |
| *Breviscelio crenatus* Sundholm | 1♀ | Rhodesia | Salisbury |  | ? October –xii.1974 | A. Watsham | V. Caleca (1992) | Microscopic slide (light microscopy) |
| *Breviscelio crenatus* Sundholm | 1♀ | Malawi | Mtuthama |  | ? August 1982 | J. Feehan | V. Caleca (1992) | SEM |
| Genus B | 1♀ | Madagascar | west coast of Masoala Peninsula N.P. S of Ambanizana | 15°42.20’ S,49°57.69’ E | 13 - 19 November 2006 | O. Popovici | M May Tschirnhaus | SEM |
| *Calliscelio* sp. 1 | 1♀ | Romania | Bacău: Galbeni |  | 31 August 2002 | O. Popovici | O. Popovici (2008) | Microscopic slide (light microscopy) |
| *Calliscelio* sp. 1 | 1♂ | Romania | Iași: Holboca |  | 30 June 2002 | I. Moglan | O. Popovici (2008) | Microscopic slide (light microscopy) |
| *Calliscelio* sp. 2 | 1♂ | USA | Los Angeles Expo Park, NHM Nature Garden | 30018"N, 118289"W | 19 October –2 November 2012 | L. Gonzalez and D. Pentcheff | O. Popovici (2014) | SEM |
| *Calotelea* sp. 1 | 1♀ | Rhodesia | Salisbury Chishawasha |  | ? April 1980 | A. Watsham | L. Masner (2008) | Microscopic slide (light microscopy) |
| *Calotelea* sp. 2 | 1♂ | Romania | Constanţa: Agigea | 44°5’ 11.1”N, 28°38’ 31.0”E | 1 October 2004 | I. Popescu | O. Popovici (2005) | Microscopic slide (light microscopy) |
| *Calotelea* sp. 2 | 1♀ | Romania | Constanţa: Agigea | 44°5’ 11.1”N, 28°38’ 31.0”E | 14 September 2006 | O. Popovici and C. Ailenei | O. Popovici (2006) | Microscopic slide (light microscopy) |
| *Calotelea* sp. 2 | 2♂ | Romania | Constanţa: Agigea | 44°5’ 11.1”N, 28°38’ 31.0”E | 15–16 September 2006 | O. Popovici and L. Fusu | O. Popovici (2006) | Microscopic slide (light microscopy) |
| *Calotelea* sp. 2 | 1♂ | Croatia | Orsac |  | 27 August 2007 | M. Mitroiu | O. Popovici (2007) | Microscopic slide (light microscopy) |
| *Calotelea* sp. 2 | 1♀ | France | Portiragnes Plages |  | 1 May 1987 | G. Delvare | O. Popovici (2014) | SEM |
| *Calotelea* sp. 3 | 1♂ | Croatia | Orsac |  | 27 August 2007 | M. Mitroiu | O. Popovici (2007) | Microscopic slide (light microscopy) |
| *Calotelea* sp. 4 | 1♂ | Croatia | Orsac |  | 27 August 2007 | M. Mitroiu | O. Popovici (2007) | Microscopic slide (light microscopy) |
| *Ceratobaeus* sp. 1 | 1♀ | Costa Rica | Puntarenas Res Priv. Karen Mogensen | 9°52’ N, 85°03’ W | 19–20 February 2009 | J.S. Noyes | O. Popovici (2014) | SEM |
| *Ceratoteleas* sp. 1 | 1♀ | Russia | Primorskiy Krai | 43°66’ N, 132°25’ E | 11–12 June 1999 | M May Michailovskaya | L. Masner (2014) | SEM |
| *Chakra* sp. 1 | 1♀ | Laos | Ventiane, Houanyang, Nat Park | 18°05.889’ N, 102°40.521’ E | 3–19 June 2008 | A. Solodovnikov and J. Pedersen | L. Masner (2014) | SEM |
| *Chromoteleia* sp. 1 | 1♀ | Panama | San Blas Nusagandi Reserve | 9°20’ N, 79°0’ W | 18–25 June 1994 | J. Pickering | L. Masner (2008) | Microscopic slide (light microscopy) |
| *Chromoteleia* sp. 1 | 1♀ | Panama | wooley 2001/028 |  |  |  |  | SEM |
| *Chromoteleia* sp. 2 | 1♂ | Brasil | Cariacica, Res. Biol. Duas Bocas | 20°16’ 21’ ‘ S, 40°28’ 40’ ‘ W | 30 April –01 May 2005 | A.P. Aguiar et al. | N. Johnson (2009) | Microscopic slide (light microscopy) |
| *Crama* sp. 1 | 1♀ | Australia | QLD, Mt. Glorious | 27°19’ 54”S, 152°45’ 29”E | 5–12 December 1998 | N. Power | L. Masner (2009) | Microscopic slide (light microscopy) |
| *Crama* sp. 1 | 1♀ | Australia | QLD, Mt. Glorious | 27°19’ 54”S, 152°45’ 29”E | 3 January 1998 | N. Power | O. Popovici (2014) | SEM |
| *Cremastobaeus* sp. 1 | 1♀ | Venezuela | Merida-Sta. Rosa |  | 3 May 1981 | L. Masner | L. Masner (2008) | Microscopic slide (light microscopy) |
| *Cremastobaeus* sp. 1 | 1♂ and 1♀ | Brasil | Melgaco, Caxiuană Trilha Igarapé Curuá | 1°42’ 50.2”S, 51°27’ 11.4”W | 20–23 November 2003 | A.P. Aguiar and J. Dias | N. Johnson (2008) | Microscopic slide (light microscopy) |
| *Cremastobaeus* sp. 2 | 1♂ and 1♀ | Togo | Region des Plateaux Abriwa-Niko, at creek Egnulu-Agbadja | 7°37’ 18"N, 00°36’ 13"E | 24 April 2008 | M. v. Tschirnhaus | O. Popovici (2014) | SEM |
| *Dichoteleas* sp. 1 | 1♀ | South Africa | Trans. 15km E. Klasene Guernsey Farm |  | 19–31 December 1985 | H. and A. Howden | L. Masner (2008) | Microscopic slide (light microscopy) |
| *Dichoteleas* sp. 2 | 1♀ | Madagascar | west coast of Masoala Peninsula N.P. S of Ambanizana | 15°42.20’ S, 49°57.69’ E | 13–19 November 2005 | M. v. Tschirnhaus | O. Popovici (2014) | SEM |
| *Dicroscelio* sp. 1 | 1♀ | Kenya | Nyanza Gembe Hills | 0°29.36’ S, 34°14.60’ E | 9–23 May 2005 |  | L. Masner (2008) | Microscopic slide (light microscopy) |
| *Dicroscelio* sp. 2 | 1♂ and 1♀ | USA | Los Angeles Expo Park, NHM Nature Garden | 30.018"N, 118.289"W | 1–18 June 2012 | Gonzales and Pentcheff | O. Popovici (2014) | SEM |
| *Dicroscelio* (*Anteromorpha* sp.) | 1♀ | Romania | Vrancea: Paltin |  | 14–15 July 2007 | N. Chiriac | O. Popovici (2008) | Microscopic slide (light microscopy) |
| *Dicroscelio* (*Anteromorpha* sp.) | 1♀ | Romania | Constanţa: Allah Bair |  | 11 September 2005 | L. Fusu | O. Popovici (2008) | Microscopic slide (light microscopy) |
| *Dicroscelio* (*Anteromorpha* sp.) | 1♂ | Romania | Tulcea: Sireasa |  | 10 June 1996 | I. Moglan | O. Popovici (2008) | Microscopic slide (light microscopy) |
| *Dicroscelio* (*Anteromorpha* sp.) | 1♂ | Romania | Tulcea: Sinoe | 44°26’ 48.79”N, 28°46’ 35.21”E | 28 August 2004 | O. Popovici | O. Popovici (2008) | Microscopic slide (light microscopy) |
| *Doddiella* sp. 1 | 1♀ | Kenya | Rift Valley Marich Pass | 1°32.18’ N, 35°27.48’ E | 4–18 April 2005 |  | L. Masner (2008) | Microscopic slide (light microscopy) |
| *Doddiella* sp. 2 | 1♂ | Paraguay | Paraguari | 25°55’ 16,5’ ‘ S, 56°47’ 15,3’ ‘ W | 30 January 2005 | B. Garcete | N. Johnson (2009) | Microscopic slide (light microscopy) |
| *Doddiella* sp. 3 | 1♀ | Malaysia | Sungai (river), Tersat at Kampong Gemuroh, SE Kuala Berdug | 5°01’ N, 102°59’ E | 11 August 1978 | M. v. Tschirnhaus | O. Popovici (2014) | SEM |
| *Duarina* sp. 1 | 1♀ | Australia | NSW, Styx Riv. St. Forest, W. End Thru Rd 980m Cedar Pit Floral Res. |  | 3–18 January 1994 | K. MacGregor | L. Masner (2009) | Microscopic slide (light microscopy) |
| *Duarina* sp. 1 | 1♀ | Australia | NSW, Styx Riv. St. Forest, 42 Km SW Wollomombi Cedar Pit Floral Res. |  | 15 December 1993–2 January 1994 | K. MacGregor | L. Masner (2014) | SEM |
| *Duta* sp.1 | 1♀ | Japan | Ibaraki Tsukuba |  | 7–11 September 1989 | M. Sharkey | L. Masner (2008) | Microscopic slide (light microscopy) |
| *Duta* sp. 1 | 17♂ and 2♀ | Romania | Tulcea: Letea | 45°17’ 58.19”N, 29°30’ 39.13”E | 26 July 2007 | O. Popovici and L. Fusu | O. Popovici (2008) | Microscopic slide (light microscopy) |
| *Duta* sp. 2 | 2♀ and 2♂ | South Africa | Eastern Cape, Dassierkrantz | 33°19.742’ S, 26°29.964’ E | 28.ii–1 March 2006 | Johnson and Musetti | N. Johnson (2009) | Microscopic slide (light microscopy) |
| *Duta* sp. 1 | 1♀ | Romania | Tulcea: Babadag |  | 13–15 August 2012 | O. Popovici | O. Popovici (2012) | SEM |
| *Dvivarnus* sp. 1 | 1♀ | Thailand | HuaKha Khaeng |  | ? February 1986 | M. Allen | L. Masner (2014) | SEM |
| *Dyscritobaeus* sp. 1 | 1♀ | Australia | Canberra, Black Mt. | 35°16’ S, 149°06’ E | 15–21 November 1998 | G.A.P. Gibson | L. Masner (2009) | Microscopic slide (light microscopy) |
| *Dyscritobaeus* sp. 2 | 1♀ | Togo | Region des Plateaux Lavie-Todji N of Huime | 7°01’ 16"N, 0°39’ 41"E | 18 April 2008 | M. v. Tschirnhaus | O. Popovici (2014) | SEM |
| *Dyscritobaeus* sp. 2 | 1♀ | Togo | Region des Plateaux Ogbatanawlou, S of Igbossiome | 7°21’ 21"N, 1°04’ 31"E | 9 April 2008 | M. v. Tschirnhaus | O. Popovici (2014) | SEM |
| *Echinoteleas* sp. 1 | 1♀ | Mozambique | Maputo |  | 1–18 March 1985 | M. Olmi | L. Masner (2014) | SEM |
| *Echthrodesis* sp. 1 | 1♀ | South Africa | Cape Penninsula Kommetjie |  | 13 June 1972 | B. Lamoral | L. Masner (2009) | Microscopic slide (light microscopy) |
| *Echthrodesis* sp. 1 | 2♀ | South Africa | Western Cape, Kommetjie, The Island | 34°8’ 24.33”S, 18°19’ 15.22”E | 5 July –9 August 2009 | S. van Noort | S. van Noort (2009) | Microscopic slide (light microscopy) |
| *Echthrodesis* sp. 1 | 1♀ and 1♂ | South Africa | Western Cape, Kommetjie, The Island | 34°8’ 24.33”S, 18°19’ 15.22”E | 5 July –9 August 2009 | S. van Noort | S. van Noort (2009) | SEM |
| *Embidobia* sp. 1 | 3♀ | Australia | NSW Elanora |  | 3 June 1964 |  | L. Masner (2011) | Microscopic slide (light microscopy) |
| *Embidobia* sp. 1 | 1♀ | Australia | NSW Elanora |  | 3 June 1964 |  | L. Masner (2011) | SEM |
| *Embioctonus* sp. 1 | 1♀ | Mexico | Quintana Roo Villa Xpu-Há |  | 9–17 December 1993 | L. Masner | L. Masner (2009) | Microscopic slide (light microscopy) |
| *Embioctonus* sp. 2 | 1♀ | USA | FL, Highlands Co. Archbold Biol. Station |  | 15 July –1 September 1987 | D.B. Wahl | L. Masner (2009) | Microscopic slide (light microscopy) |
| *Embioctonus* sp. 3 | 1♀ | Peru | Pucusana |  | 12 October 1954 | E.S. Ross | L. Masner (2014) | SEM |
| *Encyrtoscelio* sp. 1 | 5♂ and 1♀ | Romania | Constanţa: Agigea | 44°5’ 11.1”N, 28°38’ 31.0”E | 9–10 June 2008 | O. Popovici | O. Popovici (2008) | Microscopic slide (light microscopy) |
| *Encyrtoscelio* sp. 1 | 5♂ and 2♀ | Romania | Constanţa: Canaraua Fetii | 44°04’ 39’ ‘ N, 27°38’ 45’ ‘ E | 9 June 2008 | O. Popovici and I. Moglan | O. Popovici (2008) | Microscopic slide (light microscopy) |
| *Encyrtoscelio* sp. 1 | 1♀ | Romania | Botoșani: Leorda | 47°49’ 25,31”N, 26°24’ 28.39”E | 10 September 2004 | O. Popovici | O. Popovici (2008) | Microscopic slide (light microscopy) |
| *Encyrtoscelio* sp. 1 | 1♂ | Romania | Botoșani: Ezăr |  | 18 August 2004 | O. Popovici | O. Popovici (2008) | Microscopic slide (light microscopy) |
| *Encyrtoscelio* sp. 1 | 1♂ | Romania | Constanţa: Agigea | 44°5’ 11.1”N, 28°38’ 31.0”E | 28 June 1990 | M. Mitroiu | O. Popovici (2008) | Microscopic slide (light microscopy) |
| *Encyrtoscelio* sp. 2 | 2♂ | Romania | Iași: Breazu |  | 5 July 2001 | I. Moglan and O. Popovici | O. Popovici (2008) | Microscopic slide (light microscopy) |
| *Encyrtoscelio* sp. 1 | 1♂ | Romania | Iași: Miclăușeni |  | 13 August 2004 | O. Popovici and I. Moglan | O. Popovici (2008) | Microscopic slide (light microscopy) |
| *Encyrtoscelio* sp. 3 | 1♀ | Greece | Kerkini lake Nat. Park | 41°12’ 48.7”N, 23°6’ 11.9”E | 13–19 June 2007 | G. Ramel | O. Popovici (2008) | Microscopic slide (light microscopy) |
| *Encyrtoscelio* sp. 1 | 3♂ | Romania | Constanta: Agigea, dune reservation |  | 7 August 2010 | M. Popovici | O. Popovici (2014) | SEM |
| *Endecascelio* sp. 1 | 1♀ | Kenya | Rift Valley Marich Pass | 1°32.18’ N, 35°27.48’ E | 18 April –2 May 2005 |  | L. Masner (2009) | Microscopic slide (light microscopy) |
| *Endecascelio* sp. 2 | 1♀ | Mozambique | Niassa Cuamba, Mituque, Cetro Pastoral |  | 3–17 April 2012 | M. Olmi | L. Masner (2014) | SEM |
| *Epigryon* sp. 1 | 1♀ | USA | Weslaco, USDA lab. | ex. eggs Phymata sp. | 13 October 1999 | W.A. Jones | L. Masner (2009) | Microscopic slide (light microscopy) |
| *Epigryon* sp. 1 | 1♀ | USA | Weslaco, USDA lab. | ex. eggs Phymata sp. | 13 October 1999 | W.A. Jones | L. Masner (2014) | SEM |
| *Eumicrosoma* sp. 1 | 1♀ | Romania | Iasi: Marzesti |  |  | J. Noyes | O. Popovici (2014) | SEM |
| *Eumicrosoma* sp. 1 | 1♂ | Romania | Iasi: Botanical Garden |  |  | J. Noyes | O. Popovici (2014) | SEM |
| *Eumicrosoma* sp. 1 | 4♂ and 8♀ | Greece | Kerkini lake Nat. Park |  |  | G. Ramel | O. Popovici (2012) | Microscopic slide (light microscopy) |
| *Fusicornia* sp. 1 | 1♂ and 2♀ | South Africa | Eastern Cape Hilton, Table Farm New Years River bed isolated puddles | 33°15.467’ S, 26°20.954’ E | 26–27 February 2006 | Johnson and Musetti | N. Johnson (2008) | Microscopic slide (light microscopy) |
| *Fusicornia* sp. 2 | 1♀ | Madagascar | Maroantsetra | 15°25.40’ S, 49°44.39’ E | 20 November 2006 | M. v. Tschirnhaus | O. Popovici (2014) | Microscopic slide (light microscopy) |
| *Fusicornia* sp. 3 | 2♀ | Madagascar | Maroantsetra | 15°25.40’ S, 49°44.39’ E | 20 November 2006 | M. v. Tschirnhaus | O. Popovici (2014) | SEM |
| *Genatropis* sp. 1 | 1♂ | Australia | WA, Margaret River Wamer Glen Rd. Stone Cottages | 34°04’ 44”S, 115°08’ 14”E | 15–16 September 2002 | George, Hawks, Munro and Owen | L. Masner (2009) | Microscopic slide (light microscopy) |
| *Genatropis* sp. 2 | 1♂ | Australia | Queensland, Cooloola Natioanl Park | 26,03S, 153,0250E | 7 October 2002 | M. v. Tschirnhaus | O. Popovici (2014) | SEM |
| *Gryon* (*Eremioscelio*) sp. 1 | 5♂ and 1♀ | Romania | Iași: Bârnova | 46°59’ 06.6”N, 27°35’ 04.5”E | 23 August 2004 | O. Popovici | O. Popovici (2008) | Microscopic slide (light microscopy) |
| *Gryon* (*Eremioscelio*) sp. 2 | 1♂ | Romania | Iași: Bârnova | 46°59’ 06.6”N, 27°35’ 04.5”E | 23 August 2004 | O. Popovici | O. Popovici (2008) | Microscopic slide (light microscopy) |
| *Gryon* (*Eremioscelio*) sp. 3 | 1♀ | Romania | Iași: Bârnova | 46°59’ 06.6”N, 27°35’ 04.5”E | 23 August 2004 | O. Popovici | O. Popovici (2008) | Microscopic slide (light microscopy) |
| *Gryon* (*Exon*) sp. 1 | 3♂ | Romania | Constanţa: Agigea | 44°5’ 11.1”N, 28°38’ 31.0”E | 15–16 September 2006 | O. Popovici and L. Fusu | O. Popovici (2008) | Microscopic slide (light microscopy) |
| *Gryon* (*Exon*) sp. 1 | 1♂ | Romania | Constanţa: Allah Bair |  | 11 September 2005 | L. Fusu | O. Popovici (2008) | Microscopic slide (light microscopy) |
| *Gryon* (*Plesiobaeus*) sp. 1 | 1♀ | Romania | Botoșani: Roșiori |  | 8 May 2003 | O. Popovici and I. Moglan | O. Popovici (2008) | Microscopic slide (light microscopy) |
| *Gryon* (*Plesiobaeus*) sp. 1 | 1♀ | Romania | Iași: Valea lui David | 47°11’ 34.58”N, 27°28’ 05.55”E | 28 April 2000 | M. Mitroiu | O. Popovici (2008) | Microscopic slide (light microscopy) |
| *Gryon* sp. 1 | 2♀ | Romania | Iași: Bârnova | 46°59’ 37.0”N, 27°35’ 27.1”E | 18 August 2007 | O. Popovici and L. Fusu | O. Popovici (2008) | Microscopic slide (light microscopy) |
| *Gryon* sp. 2 | 2♀ | Romania | Tulcea: Letea | 45°19’ 44.9”N, 29°31’ 10.3”E | 10 June 2008 | O. Popovici | O. Popovici (2008) | Microscopic slide (light microscopy) |
| *Gryon* sp. 4 | 2♀ | USA | Los Angeles Expo Park, NHM Nature Garden | 34.116°N 118.279°W | 31 August –7 September 2013 | J. Aaron and J. Koch | O. Popovici (2014) | SEM |
| *Gryon* sp. 5 | 1♀ | French Guyana | Montagne de Kaw, Relais Patawa | 4°32’ 42”N, 52°09’ 09”W | ? March 1999 | J. Cerda | O. Popovici (2014) | SEM |
| *Gryonella* sp. 1 | 1♀ | Australia | Adelaide |  | 1 April 1995 | L. Packer | L. Masner (2014) | Microscopic slide (light microscopy) |
| *Gryonella* sp. 1 | 1♀ | Australia | South Coast Highway, near Parryville | 34.59S, 117.11E | 16 March 1989 | M. v. Tschirnhaus | O. Popovici (2014) | SEM |
| *Gryonoides* sp. 1 | 1♀ | Costa Rica | Heredia 3kmS Puerto Viejo, OTS, LaSelva |  | ? December 1992 | P. Hanson | L. Masner (2009) | Microscopic slide (light microscopy) |
| *Gryonoides* sp. 1 | 2♀ | Costa Rica | Puntarenas, Res. Priv Karen Mogensen | 9°52’ N, 85°03’ W | 19–20 February 2009 | J. S. Noyes | O. Popovici (2009) | SEM |
| GenusG | 1♂ | Chile | C05-013, UCR |  |  | J. Heraty | L. Masner (2009) | SEM |
| GenusG | 1♀ | Chile | C05-013, UCR |  |  | J. Heraty | L. Masner (2009) | Microscopic slide (light microscopy) |
| *Habroteleia* sp. 1 | 1♂ | South Korea | Chungnam, Daejeon-si, Wadong | 36°24.02’ N, 127°25.98’ E | 17 September –6 October 2006 | P. Tripotin | O. Popovici (2014) | Microscopic slide (light microscopy) |
| *Habroteleia* sp. 1 | 1♂ | Japan | Eboshi-dake, Kagoshima-shi, Kagoshima-ken | 31.25N, 130.29E | 27 August 2002 | T. Yoshida | O. Popovici (2014) | SEM |
| *Habroteleia* sp. 1 | 1♀ | Japan | Aichi Pref. Narai, Toyota |  | 6–12 September 1990 | K. Yamagishi | L. Masner (2008) | Microscopic slide (light microscopy) |
| *Habroteleia* sp. 1 | 1♀ | Japan | Eboshi-dake, Kagoshima-shi, Kagoshima-ken | 31.25N, 130.29E | 27 August 2002 | T. Yoshida | O. Popovici (2014) | SEM |
| *Heptascelio hamatus* Masner and Johnson | 1♀ | Thailand | Phetchabun Nam Nao Nat. Park. | 16°43.156’ N, 101°35.118’ E | 6–7 viii.2006 | N. Hongyothi and L. Janteab | N. Johnson (2008) | Microscopic slide (light microscopy) |
| *Heptascelio* sp. 2 | 1♀ | Uganda | Kibale Nat. Park, Kanyawara Biol Station | 00°33’ 54.1"N, 30°21’ 28,1’ E | 6–13 June 2010 | S. Katusabe | O. Popovici (2014) | SEM |
| *Heptascelio hamatus* Masner and Johnson | 1♀ | Thailand | Chiang Mai Doilnthanon, Nat. Park |  | 7–12 May 1990 | E. Fuller | Paratype. | Microscopic slide (light microscopy) |
| *Hickmanella* sp. 1 | 1♀ | Tasmania | Domain | ex. eggs Breda jovialis (Koch) | 9 December 1967 | V. May Hickman | L. Masner (2009) | Microscopic slide (light microscopy) |
| *Hickmanella* sp. 2 | 1♀ | New Caledonia | Nord Ponerihouen, Foret de Aoupinie, primary forest |  | 12–24 January 2006 | P. Tripotin | L. Masner (2014) | SEM |
| *Holoteleia bicolor* (Harrington) | 1♀ | Canada | Ontario: Ottawa |  | 19 September 1980 | H. Goulet | L. Masner (2008) | Microscopic slide (light microscopy) |
| *Holoteleia bicolor* (Harrington) | 2♀ | Canada | Ontario: Ottawa, Nepean Tanglewood |  | 18–20 August 2014 | O. Popovici and L. Masner | Popovici (2014) | SEM |
| *Huddlestonium* exu Polazsek and Johnson | 1♀ | São Tomé | Bom Successo; Leon De Bell |  |  |  | A. Polaszek (2010) | Microscopic slide (light microscopy) |
| *Idris* sp. 1 | 2♂ | Romania | Iași: Bârnova | 46°59’ 37.0”N, 27°35’ 27.1”E | 8 July 2008 | O. Popovici | O. Popovici (2008) | Microscopic slide (light microscopy) |
| *Idris* sp. 1 | 1♂ | Romania | Iași: Bârnova | 46°59’ 37.0”N, 27°35’ 27.1”E | 18 August 2007 | O. Popovici and L. Fusu | O. Popovici (2008) | Microscopic slide (light microscopy) |
| *Idris* sp. 2 | 2♂ | Romania | Iași: Ciric |  | 28 June 2006 | O. Popovici | Popovici (2014) | SEM |
| *Janzenella innupta* Masner and Johnson | 1♀ | Costa Rica | Guan Santa Rosa Nat. Park |  | 1–21 February 1987 | I. Gauld | Paratype | Microscopic slide (light microscopy) |
| *Janzenella innupta* Masner and Johnson | 1♀ | Costa Rica | Guan Santa Rosa Nat. Park |  | 21 February –14 March 1987 | I. Gauld | Paratype | SEM |
| *Leptoteleia americana* Masner | 1♀ | USA | TN, Blount Co. Top of the World | 35°38’ N, 83°55’ W | 10 September –24 September 1998 | H. Alley | L. Masner (2008) | SEM |
| *Leptoteleia* sp. 1 | 1♂ and 2♀ | USA | Ohio, Franklin Co. Columbus@Kinnear Rd. | 39°59.936’ N, 83°02.809’ W | 16–23 September 2003 | N. Johnson | N. Johnson (2008) | Microscopic slide (light microscopy) |
| *Lidgbirdius* sp. 1 | 1♀ | Australia | NSW, LordHowe Island |  | 17–31 May 1980 | S.J. Peck | L. Masner (2009) | Microscopic slide (light microscopy) |
| *Lidgbirdius* sp. 1 | 1♀ | Australia | NSW, LordHowe Island |  | 17–31 May 1980 | S.J. Peck | L. Masner (2009) | SEM |
| *Lispoteleia* sp. 1 | 1♀ | Fiji | Viti Levu I.Vuda Prov., Koroyanitu Eco Park, 0.5 km N Abaca Vlg | 17.667°S, 177.55° E | 21 September –7 October 2002 | Schlinger and Tokota | L. Masner (2008) | Microscopic slide (light microscopy) |
| *Lispoteleia* sp. 2 | 1♀ | Indonesia | Sulawesi, Dumoga-Bone Nat. Park |  | 15–20 June 1985 | Wallace expedition | L. Masner (2014) | SEM |
| *Macroteleia* sp. 1 | 2♀ | Romania | Tulcea: Letea | 45°19’ 44.9”N, 29°31’ 10.3”E | 26 July 2007 | O. Popovici and L. Fusu | O. Popovici (2008) | Microscopic slide (light microscopy) |
| *Macroteleia* sp. 2 | 1♀ | Romania | Tulcea: Letea | 45°19’ 44.9”N, 29°31’ 10.3”E | 26 July 2007 | O. Popovici and L. Fusu | O. Popovici (2008) | Microscopic slide (light microscopy) |
| *Macroteleia* sp. 2 | 1♀ | Romania | Vrancea: Ivăncești |  | 16–17 August 2007 | N. Chiriac | O. Popovici (2008) | Microscopic slide (light microscopy) |
| *Macroteleia* sp. 2 | 1♀ | Greece | Kerkini lake Nat. Park | 41°12’ 48.7”N, 23°6’ 11.9”E | 20–26 June 2007 | G. Ramel | O. Popovici (2008) | Microscopic slide (light microscopy) |
| *Macroteleia* sp. 3 | 1♀ | Greece | Kerkini lake Nat. Park | 41°11’ 32.4”N, 23°3’ 59.5”E | 1–7 August 2007 | G. Ramel | O. Popovici (2008) | Microscopic slide (light microscopy) |
| *Macroteleia* sp. 4 | 1♀ | Romania | Vrancea: Paltin |  | 14–15 July 2007 | N. Chiriac | O. Popovici (2008) | Microscopic slide (light microscopy) |
| *Macroteleia* sp. 5 | 1♀ | Romania | Iași: Bârnova | 46°59’ 37.0”N, 27°35’ 27.1”E | 17 August 04 | O. Popovici | O. Popovici (2004) | Microscopic slide (light microscopy) |
| *Macroteleia* sp. 5 | 1♀ | Romania | Iași: Valea lui David | 47°11’ 34.58”N, 27°28’ 05.55”E | 13 August 2000 | M. Mitroiu | O. Popovici (2004) | Microscopic slide (light microscopy) |
| *Macroteleia* sp. 5 | 1♂ | Romania | Iași: Botanical Garden | N47°11’ 10”, E27°32’ 59” | 25 July 2005 | L. Fusu | O. Popovici (2008) | Microscopic slide (light microscopy) |
| *Macroteleia* sp. 5 | 12♀ and 2♂ | Romania | Iași: Bârnova | 46°59’ 37.0”N, 27°35’ 27.1”E | 15 July 2006 | O. Popovici | O. Popovici (2007) | Microscopic slide (light microscopy) |
| *Macroteleia* sp. 6 | 1♀ | Panama | wooley 2001/028 |  |  |  |  | SEM |
| *Mallateleia* sp. 1 | 1♀ | Australia | WA, Mt. Augustus Nat. Park Mundee Trail Head | 24°21.9’ N, 116°51,7’ E | 9–22 May 2003 | M.E. Irwin F.D. Parker | L. Masner (2008) | Microscopic slide (light microscopy) |
| *Mallateleia* sp. 2 | 1♂ | Australia | Queensland, Carnarvon Nat. Park, Mt. Moffatt | 24,5827S, 147,5934E | 11 October 2002 | M. v. Tschirnhaus | O. Popovici (2014) | SEM |
| *Mantibaria seefelderiana* (De Stefani) | 1♀ | Portugal | Barcelos |  | 27 September 2009 | Rui Andrade | O. Popovici (2009) | Microscopic slide (light microscopy) |
| *Mantibaria* sp. 1 | 1♀ | Congo | Voka n. Boko | eggs Mantids | ? February 1973 |  | L. Masner (2006) | Microscopic slide (light microscopy) |
| *Mantibaria seefelderiana* (De Stefani) | 5♀ | Greece | Mani, near Areopoli | eggs Mantids | 29 June –3 July 1997 | J.M. Maldes | O. Popovici (2014) | Microscopic slide (light microscopy) |
| *Mantibaria seefelderiana* (De Stefani) | 3♀ | Greece | Mani, near Areopoli | eggs Mantids | 29 June –3 July 1997 | J.M. Maldes | O. Popovici (2014) | SEM |
| *Maruzza* sp. 1 | 1♀ | South Africa | Kwazulu–Natal, Pietermaritzburg Hilton |  | 28 October –12 November 2003 | M. Mostowski | L. Masner (2009) | Microscopic slide (light microscopy) |
| *Maruzza* sp. 1 | 1♀ | Nigeria | Ibadan |  | ? October 1987 | J.S. Noyes | L. Masner (2014) | SEM |
| *Masnerella cincta* (Harrington) | 1♀ | USA | NC, Swain Co. Andrews Bald | 35°32’ 13”N, 83°29’ 39”W | 7 August –11 September 2002 | I.C. Stocks | L. Masner (2008) | Microscopic slide (light microscopy) |
| *Masnerella cincta* (Harrington) | 2♀ | Canada | Ontario: Ottawa, Nepean Tanglewood |  | 18–20 August 2014 | Popovici and Masner | Popovici (2014) | SEM |
| *Mecix* sp. 1 | 1♀ | USA | TX; Bastrop Co. Bastrop S.P. |  | 10–22 August 1990 | R. Wharton | L. Masner (2009) | Microscopic slide (light microscopy) |
| *Mecix* sp. 1 | 1♀ | USA | TX; Bastrop Co. Bastrop S.P. |  | 10–22 August 1990 | R. Wharton | L. Masner (2014) | SEM |
| *Merriwa* sp. 1 | 1♀ | Indonesia | Java Barat, Cianjur, Kebun Raya Cibodas |  | 29 January –4 February 2004 | M. Maruyama. | O. Popovici (2014) | SEM |
| *Microthoron* sp. 1 | 1♀ | Thailand | Nakhon Si Thammarat, Namtoc Yong N.P. | 8°10.434’ N, 99°44.508’ E | 23–30 September 2008 | K. U-prai | L. Masner (2013) | Microscopic slide (light microscopy) |
| *Microthoron* sp. 2 | 2♀ | Togo | Region de Plateaux, Zogbegan Carriere, at creek Elebe | 7°34’ 50"N, 00°40’ 03’ E | 20 April –25 April 2008 | M. v. Tschirnhaus | O. Popovici (2014) | SEM |
| *Mirobaeoides* sp. 1 | 2♀ | Australia | ACT, Canberra, Black Mtn | 35°16’ S, 149°06’ E | 8–14 February 1998 | G. Gibson | L. Masner (2009) | Microscopic slide (light microscopy) |
| *Mirobaeoides* sp. 2 | 1♀ | Tasmania | Domain |  | 21 January 1967 | V. May Hickman | L. Masner (2014) | SEM |
| *Mirobaeus* sp. 1 | 1♀ | Tasmania | Fern Tree | eggs *Stiphidium facetum* | 25 January 1967 | V. May Hickman | L. Masner (2009) | Microscopic slide (light microscopy) |
| *Mirobaeus* sp. 1 | 1♀ | Tasmania | Fern Tree | eggs *Stiphidium facetum* | 25 January 1967 | V. May Hickman | L. Masner (2014) | SEM |
| *Neobaeus* sp. 1 | 1♀ | New Zealand | Walpoua |  | 6–10 February 1995 | L. LeSage | L. Masner (2013) | Microscopic slide (light microscopy) |
| *Neobaeus* sp. 1 | 1♀ | New Zealand | Walpoua |  | 6–10 February 1995 | L. LeSage | L. Masner (2014) | SEM |
| *Neoscelio* sp. 1 | 1♀ | Australia | NSW, 1300m, New England |  | ? February –? March 1960 | Newton and Thayer | L. Masner (2008) | Microscopic slide (light microscopy) |
| *Neoscelio* sp. 1 | 1♂ | Australia | Queensland Mount Glorious | 27°19’ 54”S, 152°45’ 29”E | 7–13 February 1998 | N. Power | O. Popovici (2014) | SEM |
| *Neuroscelio doddi* Galloway, Austin and Masner | 1♀ | Australia | Qld. Mount Glorious | 27°19’ 54”S, 152°45’ 29”E | 7–13 February 1998 | N. Power | L. Masner (2008) | Microscopic slide (light microscopy) |
| *Neuroscelio doddi* Galloway, Austin and Masner | 2♀ | Australia | Qld. Mount Glorious | 27°19’ 54”S, 152°45’ 29”E | 7–13 February 1998 | N. Power | O. Popovici (2014) | SEM |
| *Nixonia* sp. 1 | 1♀ | Gl07-Kop2m14 |  |  |  |  | N. Johnson (2009) | Microscopic slide (light microscopy) |
| *Nixonia watshami* Johnson and Masner | 1♀ | Rhodesia | Salisbury |  | ? April 1982 | A. Watsham | Paratype | SEM |
| *Nyleta striaticeps* Dodd | 1♀ | Australia | QLD, Mt. Glorious | 27°19’ 54”S, 152°45’ 29”E | 6 March 1998 | N. Power | L. Masner (2008) | Microscopic slide (light microscopy) |
| *Nyleta striaticeps* Dodd | 1♀ | Australia | Queensland, Bunya Mts, Nat Park | 26°5285’ S, 151°3535’ E | 18–19 December 2002 | J. Munro and A. Owen | L. Masner (2014) | SEM |
| *Odontacolus* sp. 1 | 1♀ | Costa Rica | Punt. Corcovado, Nat. Park, 200m, Los Patos | 8°33’ N, 83°30’ W | 1–9 March 2000 | J. Noyes | L. Masner | Microscopic slide (light microscopy) |
| *Odontacolus* sp. 1 | 1♀ | Paraguay | Canindayu Reserve Natural Bosque Mbaracayu, Jejui-mi |  | 24–28 May 1996 | A.C.F. Costa | N. Johnson (2009) | Microscopic slide (light microscopy) |
| *Odontacolus* sp. 2 | 1♀ | French Guyana | Kaw Mountains | 52°12.425W, 4°33.562N | 16 July 2006 | K.Sarv | O. Popovici (2014) | SEM |
| *Odontacolus* sp. 2 | 1♀ | French Guyana | Kaw Mountains | 52°12.425W, 4°33.562N | 23 June 2006 | K. Sarv | O. Popovici (2014) | SEM |
| *Odontoscelio* sp. 1 | 1♂ | South Africa | Kwazulu–Natal, Hluhluwe Game Res |  | ? December 1997 | J.G.H. Londt | L. Masner (2009) | Microscopic slide (light microscopy) |
| *Odontoscelio* sp. 1 | 1♂ | Togo | Region Maritime, NE of Mission Tove, near river Zio | 6°20’ 48"N,1°06’ 59"E | 5 April 2008 | M. v. Tschirnhaus | O. Popovici (2014) | SEM |
| *Odontoscelio* sp. 1 | 1♂ | Togo | Plateau de Danyi near Dzogbegan, at river Danyi | 7°14’ 30"N,0°40’ 45"E | 14 April 2008 | M. v. Tschirnhaus | O. Popovici (2014) | SEM |
| *Oethecoctonus* sp. 1 | 1♀ | Costa Rica | Guan Estación Cacao |  | 23–24 February 2001 | J. Noyes | L. Masner (2008) | Microscopic slide (light microscopy) |
| *Oethecoctonus* sp. 2 | 1♀ | French Guyana | Kaw Mountains, Relais Patawa | 4°32’ 42"N,52°09’ 09"W | ?.vi–vii.1999 | J. Cerda | O. Popovici (2014) | SEM |
| *Opisthacantha mellipes* Ashmead | 1♀ | Canada | On. Wylde Lk. Bog, 8k E Arthur |  | 24–31 May 1987 |  | L. Masner (2008) | Microscopic slide (light microscopy) |
| *Opisthacantha* sp. 1 | 1♀ | Indonesia | Isle Java, Kaliurang, Yogjakarta |  | 9 September 1992 | M. v. Tschirnhaus | O. Popovici (2014) | SEM |
| *Opisthacantha* (*Lapitha*) | 1♂ and 1♀ | Brasil | SP, Salesópolis Est. Biol. Boracéia Trilha dos Pilões | 23°39’ 07.3”S, 45°53’ 52.0”W | 19–22 October 2002 | A.P. Aguiar and J.S. Freitas | N. Johnson (2008) | Microscopic slide (light microscopy) |
| *Opisthacantha* (*Lapitha*) | 1♀ | French Guyana | Kaw Mountains, Relais Patawa | 4°32’ 42”N, 52°09’ 09”E | ? April 2001 | J. Cerda | O. Popovici (2014) | SEM |
| *Opisthacantha* (*Trissoscelio*) sp. 1 | 1♀ | Sulawesi | Utara Dumoga-Bone, Nat. Park Toraut |  | 9.–16 May 1985 | J. Noyes | L. Masner (2008) | Microscopic slide (light microscopy) |
| *Opisthacantha* (*Trissoscelio*) sp. 2 | 1♀ | Indonesia | Java Barat, Cianjur, Kebun Raya Cibodas |  | 29 January –4 February 2004 | M. Maruyama | O. Popovici (2014) | SEM |
| *Opisthacantha* (*Vardhana*)sp. 1 | 2♀ | South Africa | Ramsgate Butterfly Sanctuary | 30°53.3’ S, 30°20.4’ E | 15–19 March 2005 | V. Kolyada | L. Masner (2010) | Microscopic slide (light microscopy) |
| *Opisthacantha* (*Vardhana*)sp. 1 | 1♀ | South Africa | Ramsgate Butterfly Sanctuary | 30°53.3’ S, 30°20.4’ E | 15–19 March 2005 | V. Kolyada | L. Masner (2010) | SEM |
| *Oreiscelio* sp. 1 | 1♀ | South Africa | Northern the Downs Nature Reserve | 24°12.34’ S, 30°20.71’ E | 8 February 1998 | J. Heraty | L. Masner (2008) | Microscopic slide (light microscopy) |
| *Oreiscelio* sp. 1 | 1♀ | South Africa | Transvaal, GuernseyFarm |  | 19–31 December 1985 | J. Peck, Woodland | L. Masner (2014) | SEM |
| *Orwelium enigmaticum* Johnson, Masner and Musetti | 1♀ and 1♂ | Chile | Chiloe Is, 70m Ahori Alto |  | ? April 1988 | L. Masner | Paratype | Microscopic slide (light microscopy) |
| *Orwelium enigmaticum* Johnson, Masner and Musetti | 1♀ and 1♂ | Chile | Correntoso, Llanquihue, Alerce Andino Nat. Park | 41.46°S, 72.64°W | 30 January 2007 | B. Brown | O. Popovici (2014) | SEM |
| *Oxyscelio* sp. 1 | 1♀ | Sulawesi | Utara Dumoga-Bone Nat. Park Toraut |  | 9–16 May 1985 | J. Noyes | L. Masner (2008) | Microscopic slide (light microscopy) |
| *Oxyscelio* sp. 2 | 1♀ and 1♂ | Thailand | Chiang Mai, Doi Inthanon Nat. Park. | 18°32.657’ N, 98°31.482’ E | 8–15 July 2006 | Y. Areeluck | N. Johnson (2009) | Microscopic slide (light microscopy) |
| *Oxyscelio* sp. 3 | 2♀ | Australia | Camberra, Black Mountains | 35.16S, 149.06E | ?.?.1999 | G. Gibson | O. Popovici (2014) | SEM |
| *Oxyteleia* sp. 1 | 1♀ | Taiwan | Pingtung Kenting For.Rec.Area |  | 27 November –1 December 1990 | C.K. Starr | L. Masner (2008) | Microscopic slide (light microscopy) |
| *Oxyteleia* sp. 2 | 1♂ | Togo | Region des Plateaux Obe, near Akloa at creek Bena | 7°31’ 56”N, 0°36’ 36”E | 22 April 2008 | M. v. Tschirnhaus | O. Popovici (2014) | SEM |
| *Palaeogryon* sp. 1 | 1♀ | French Guyana | 18 km, S5E Roura | 4°36’ 6”S, 52°13’ 41”W | 22 May –10 June 1997 | J. Ashe and R. Brooks | L. Masner (2008) | Microscopic slide (light microscopy) |
| *Palaeogryon* sp. 2 | 1♀ | Venezuela | Bolivar 125kmS El Dorado |  | 18 July –7 August 1986 | B. Gill | L. Masner (2014) | SEM |
| *Palpoteleia* sp. 1 | 1♀ | Kenya | Nyanza Nyangera | 0°3’ 55.9”S, 34°4’ 52.2”E | 6 December 2003–3 March 2004 | I. Přikryl | L. Masner (2008) | Microscopic slide (light microscopy) |
| *Palpoteleia* sp. 1 | 2♀ | Madagascar | Isle Nosi Mangabe | 15°29.78’ S, 49°45.71’ E | 10 November 2006 | M. v. Tschirnhaus | O. Popovici (2014) | SEM |
| *Palpoteleia* sp. 1 | 2♀ | Madagascar | Maroantsetra | 15°25.40’ S, 49°44.39’ E | 20 November 2006 | M. v. Tschirnhaus | O. Popovici (2014) | SEM |
| *Parascelio* sp. 1 | 1♀ | Trinidad | Curepe |  | 23–27 November 1977 |  | L. Masner (2008) | Microscopic slide (light microscopy) |
| *Parascelio* sp. 2 | 1♀ | French Guyana | Kaw Mountains Relais Patawa | 4°32’ 42"N, 52°09’ 09"W | ? March 1999 | J. Cerda | O. Popovici (2014) | SEM |
| *Paratelenomus* sp. 1 | 1♀ | Romania | Iași: Bârnova | 46°59’ 37.0”N, 27°35’ 27.1”E | 2 August 2008 | O. Popovici | O. Popovici (2008) | Microscopic slide (light microscopy) |
| *Paratelenomus* sp. 1 | 1♀ | Romania | Iași: Botanical Garden | 47°11’ 10”N, 27°32’ 59”E | 13 July 2008 | O. Popovici | O. Popovici (2008) | Microscopic slide (light microscopy) |
| *Paratelenomus* sp. 1 | 1♀ | Romania | Iași: Bârnova | 46°59’ 37.0”N, 27°35’ 27.1”E | 8 July 2008 | O. Popovici | O. Popovici (2008) | Microscopic slide (light microscopy) |
| *Paratelenomus* sp. 1 | 1♀ | Romania | Iași: Botanical Garden | 47°11’ 10”N, 27°32’ 59”E | 19 June 2004 | O. Popovici | O. Popovici (2008) | Microscopic slide (light microscopy) |
| *Paratelenomus* sp. 1 | 1♀ | Romania | Iași: Miclăușeni |  | 13 August 2004 | O. Popovici and I. Moglan | O. Popovici (2008) | Microscopic slide (light microscopy) |
| *Paratelenomus* sp. 1 | 1♀ | Romania | Iași: Adamachi |  | 2 August 2003 | O. Popovici | O. Popovici (2008) | Microscopic slide (light microscopy) |
| *Paratelenomus* sp. 2 | 2♀ | Togo | Region des Plateaux Abriwa-Niko, at creek Egnulu-Agbadja | 07°37’ 18”N, 00°36’ 13”E | 24 April 2008 | M. v. Tschirnhaus | O. Popovici (2014) | SEM |
| *Paridris pallipes* (Ashmead) | 1♀ | USA | NC, Swain Co. Andrews Bald | 35°32’ 13”N, 83°29’ 39”W | 18 July –7 August 2002 | I. C. Stocks | L. Masner (2008) | Microscopic slide (light microscopy) |
| *Paridris* sp. 1 | 1♀ | Romania | Iași: Ciric | 47°14’ 35.99”N, 27°34’ 45.37”E | 28 June 2006 | O. Popovici | O. Popovici (2008) | Microscopic slide (light microscopy) |
| *Paridris* sp. 1 | 1♀ | Romania | Iași: Botanical Garden | 47°11’ 10”N; 27°32’ 59”E | 26 May 2004 | O. Popovici | O. Popovici (2008) | Microscopic slide (light microscopy) |
| *Paridris* sp. 2 | 2♂ | Togo | Region Maritime, foret de la Lili | 6°34’ 04”N; 1°10’ 38”E | 6 April 2008 | M. v. Tschirnhaus | O. Popovici (2014) | SEM |
| *Paridris* sp. 2 | 1♂ | Togo | Region du Centre, Nikenge | 8°06’ 40”N; 0°45’ 54”E | 28 April 2008 | Ssymank and M. v. Tschirnhaus | O. Popovici (2014) | SEM |
| *Phanuromyia* sp. 1 | 1♀ | Thailand | Chaiyaphum Pa Hin Ngam Nat. Park | 15°34.802’ N, 101°25.990’ E | 14–15 November 2006 | K. Sa-nog and B. Adnafai | L. Masner (2009) | Microscopic slide (light microscopy) |
| *Phanuromyia* sp. 2 | 1♀ | Thailand | Phetchabun Nam Nao Nat. Park | 16°43.687’ N; 101°33.754’ E | 22–29 March 2007 | L. Janteab | L. Masner (2014) | SEM |
| *Phanuropsis* sp. 1 | 1♀ | Colombia | Palmira | eggs *Antiteuchus tripterus* | ? March 1995 | F. Pedreros | L. Masner (2009) | Microscopic slide (light microscopy) |
| *Phanuropsis* sp. 1 | 1♀ | Colombia | Palmira | eggs *Antiteuchus tripterus* | ? March 1995 | F. Pedreros | L. Masner (2014) | SEM |
| *Phoenoteleia* sp. 1 | 1♀ | Sulawesi | Utara Dumoga-Bone, Nat. Park, Toraut |  | 9–16 May 1985 | J. Noyes | L. Masner (2009) | Microscopic slide (light microscopy) |
| *Phoenoteleia* sp. 2 | 1♀ | Thailand | Nakhon Si Thammarat, Namtoc Yong N.P. Khao Ram Rome | 8°13.3’ N; 99°48.388’ E | 12–13. ii. 2009 | Paiboon | L. Masner (2014) | SEM |
| *Platyscelio* sp. 1 | 1♀ | Thailand | Phetchabun Nam Nao Nat. Park | 16°43.695’ N, 101°33.797’ E | 13–20 November 2006 | N. Hongyothi | L. Masner (2009) | Microscopic slide (light microscopy) |
| *Platyscelio* sp. 2 | 2♂ | Togo | Region Maritime NE of Mission Tove, near river Zio | 6°20’ 48"N, 1°06’ 59"E | 5 April 2008 | M. v. Tschirnhaus | O. Popovici (2014) | SEM |
| *Plaumannion* sp. | 1♀ | Brazil | Nova Teutonia | 27°11’ S, 52°23’ W | ? October –? December 1972 | F. Plaumann | L. Masner | SEM |
| *Probaryconus* sp. 1 | 1♀ | USA | Monroe Co, N. KeyLargo, Sec. 35 |  | 1 August –16 November 1985 |  | L. Masner (2008) | Microscopic slide (light microscopy) |
| *Probaryconus* sp. 2 | 1♂ | Romania | Iași: Botanical Garden | 47°11’ 10”N, 27°32’ 59”E | 24 July 2005 | O. Popovici | O. Popovici (2008) | Microscopic slide (light microscopy) |
| *Probaryconus* sp. 2 | 1♀ | Romania | Iași: Botanical Garden | 47°11’ 10”N, 27°32’ 59”E | 1 June 2004 | O. Popovici | O. Popovici (2008) | Microscopic slide (light microscopy) |
| *Probaryconus* sp. 2 | 1♂ | Romania | Iași: Botanical Garden | 47°11’ 10”N, 27°32’ 59”E | 19 June 2004 | O. Popovici | O. Popovici (2008) | Microscopic slide (light microscopy) |
| *Probaryconus* sp. 2 | 3♂ | Romania | Botoșani: Leorda | 47°49’ 25,31”N, 26°24’ 28.39”E | 10 August 2004 | O. Popovici | O. Popovici (2008) | Microscopic slide (light microscopy) |
| *Probaryconus* sp. 2 | 1♀ | Romania | Botoșani: Roma | 47°50’ 6.97”N, 26°35’ 5.26”E | 23 July 2003 | O. Popovici | O. Popovici (2008) | Microscopic slide (light microscopy) |
| *Probaryconus* sp. 2 | 1♀ | Romania | Piatra - Neamt: Crângu |  | 17 May 2005 | O. Popovici | O. Popovici (2008) | Microscopic slide (light microscopy) |
| *Probaryconus* sp. 2 | 1♀ | Romania | Constanţa: Hagieni | 43°47’ 48.47”N, 28°27’ 26.27”E | 11 May 2005 | O. Popovici and L. Fusu | O. Popovici (2008) | Microscopic slide (light microscopy) |
| *Probaryconus* sp. 2 | 1♀ | Romania | Iași: Poieni | 47°3’ 48.25”N, 27°42’ 28.97”E | 11 June 2005 | O. Popovici | O. Popovici (2008) | Microscopic slide (light microscopy) |
| *Probaryconus* sp. 2 | 1♂ | Romania | Iasi: Botanical Garden |  | 28 July 2005 | O. Popovici | O. Popovici (2014) | SEM |
| *Probaryconus* sp. 2 | 1♀ | Romania | Constanta: Agigea, dune reservation |  | 14 May 2005 | O. Popovici | O. Popovici (2014) | SEM |
| *Protelenomus* sp. 1 | 1♀ | Ghana | Bosuso |  | 27 August 1963 | E. Bond | L. Masner (2009) | Microscopic slide (light microscopy) |
| *Protelenomus* sp. 1 | 1♀ | Nigeria | Ibadan |  | 4 March 1976 | C. Ochieng | L. Masner (2014) | SEM |
| *Pseudanteris insignis*Fouts | 1♀ | Canada | ON: Nepean Jock River at Hwy 16 |  | 9–10 August 1999 | L. Masner | L. Masner | Microscopic slide (light microscopy) |
| *Pseudanteris insignis*Fouts | 3♀ and 1♂ | USA | NH, Merrimack Co, Sewalls Falls nr Concord | 43°16’ 16”N, 71°33’ 53”W | 21–23 August 2012 | L. Masner | L. Masner (2014) | SEM |
| *Pseudoheptascelio* sp. 1 | 1♀ | Trinidad |  | eggs *Cornops longicorne* |  |  | paratype *Tanaoscelio cornopis* Masner | Microscopic slide (light microscopy) |
| *Pseudoheptascelio* sp. 2 | 1♀ | Bolivia | Cochabamba Villa Tunari | 16°54’ 55”S, 65°22’ 06”W | 7 May 2001 | H. Heider | paratype of *Pseudoheptascelio rex* | SEM |
| *Psilanteris* sp. 1 | 10♀ | Romania | Botoșani: Leorda | 47°49’ 25,31”N, 26°24’ 28.39”E | 1 May 2005 | O. Popovici | O. Popovici (2008) | Microscopic slide (light microscopy) |
| *Psilanteris* sp. 1 | 3♂ | Romania | Botoșani: Leorda | 47°49’ 25,31”N, 26°24’ 28.39”E | 12 September 2005 | O. Popovici | O. Popovici (2008) | Microscopic slide (light microscopy) |
| *Psilanteris* sp. 1 | 1♀ | Romania | Botoșani: Găvan |  | 9 August 2003 | O. Popovici | O. Popovici (2008) | Microscopic slide (light microscopy) |
| *Psilanteris* sp. 1 | 1♀ | Romania | Iași: Bârnova | 46°59’ 37.0”N, 27°35’ 27.1”E | 13 May 2007 | O. Popovici and M. Mitroiu | O. Popovici (2008) | Microscopic slide (light microscopy) |
| *Psilanteris* sp. 1 | 1♂ | Romania | Constanţa: Hagieni | 43°47’ 48.47”N, 28°27’ 26.27”E | 11 May 2005 | O. Popovici | O. Popovici (2008) | Microscopic slide (light microscopy) |
| *Psilanteris* sp. 1 | 1♂ | Romania | Bacău: Galbeni |  | 17 July 2004 | O. Popovici | O. Popovici (2008) | Microscopic slide (light microscopy) |
| *Psilanteris* sp. 1 | 1♂ | Romania | Vrancea: Valea Sării |  | 19 June 2005 | L. Fusu | O. Popovici (2008) | Microscopic slide (light microscopy) |
| *Psilanteris* sp. 1 | 1♀ | Romania | Prahova: Slănic |  | 19 August 2004 | I. Popescu | O. Popovici (2008) | Microscopic slide (light microscopy) |
| *Psilanteris* sp. 1 | 2♀ | Romania | Tulcea, Letea near the dune |  | 26 July 2007 | O. Popovici and L. Fusu | O. Popovici (2014) | SEM |
| *Psix abnormis* Kozlov and Lê | 1♀ | Rhodesia | Salisbury |  | ?.ix–? December 1975 | A. Watsham | L. Masner (2006) | Microscopic slide (light microscopy) |
| *Psix abnormis* Kozlov and Lê | 1♀ | Kenya | Nyanza Ungoye | 0°36.91’ S, 34°05.52’ E | 6–19 May 2006 | R. Copeland | L. Masner (2009) | SEM |
| GenusQ | 1♂ and 1♀ | Honduras | Roatan Is. West Bay | 16°17’ 00"N, 86°35’ 52"W | 24–25 November 2012 | L. Masner | L. Masner (2014) | SEM |
| GenusQ | 1♂ and 1♀ | Honduras | Roatan Is. West Bay | 16°17’ 00"N, 86°35’ 52"W | 24–25 November 2012 | L. Masner | L. Masner (2014) | Microscopic slide (light microscopy) |
| *Romilius zotale* Walker | 1♀ | Chile | Chiloe Isl. Tarae |  | 12 March –15 March 2005 |  | L. Masner (2009) | Microscopic slide (light microscopy) |
| *Romilius zotale* Walker | 1♂ | Chile | Chiloe Isl. Tarae |  | 12 March –15 March 2006 |  | L. Masner (2009) | SEM |
| *Sceliacanthella* sp. 1 | 1♀ | Australia | Qld, 30m, Indooroopilly |  | 28 February –9 March 1984 | L. Masner | L. Masner (2008) | Microscopic slide (light microscopy) |
| *Sceliacanthella* sp. 1 | 1♀ | Australia | QLD, Wooroonoonan Nat. Park | 17°34’ 06”S, 145°42’ 21”E | 25–26 September 2004 | L. Masner | L. Masner (2009) | Microscopic slide (light microscopy) |
| *Sceliacanthella* sp. 2 | 1♀ | New Caledonia | Ponerihouen, Foret de Aoupinie |  | 12–24 January 2006 | P. Tripotin | L. Masner (2014) | SEM |
| *Scelio* sp. 1 | 2♀ | Paraguay | Paraguay del Chaco, Parque Cue, Pozo Independencia II | 20°9’ 00,4”S, 61°46’ 25,3”W | 6–8 April 2005 | B. Garcete | N. Johnson (2008) | Microscopic slide (light microscopy) |
| *Scelio* sp. 2 | 5♂ | Romania | Iași: Bârnova | 46°59’ 06.6”N, 27°35’ 04.5”E | 18 August 2007 | O. Popovici and L. Fusu | O. Popovici (2008) | Microscopic slide (light microscopy) |
| *Scelio* sp. 2 | 1♀ | Romania | Dorohoi: Sendriceni |  | 18–19 July 2012 | A. Moruzi | O. Popovici (2014) | SEM |
| *Scelio* sp. 3 | 2♂ and 1♀ | Romania | Piatra-Neamt: Potoci | 46°57’ 21.41”N, 26°7’ 58.17”E | 13 August 2004 | O. Popovici and I. Moglan | O. Popovici (2008) | Microscopic slide (light microscopy) |
| *Scelio* sp. 4 | 1♀ | French Guyana | Roura Montagne de Chevaux |  | 1–31 October 2009 |  | O. Popovici (2014) | SEM |
| *Scelio* sp. 5 | 1♂ | French Guyana | Roura Montagne de Chevaux |  | 1–31 October 2009 |  | O. Popovici (2014) | SEM |
| *Scelio* (*Lepidoscelio*) sp. | 1♀ | Brasil | Nova Teutonia |  | 2 February 1950 | F. Plaumann | L. Masner | Microscopic slide (light microscopy) |
| *Sceliomorpha* sp. 1 | 1♀ | Costa Rica | Heredia Estac. Biol. La Selva | 10°26’ N, 84°01’ W | 27–28 February 2003 | J. Noyes | L. Masner (2008) | Microscopic slide (light microscopy) |
| *Sceliomorpha* sp. 2 | 1♂ and 2♀ | Brasil | PA, Melgaço, Caxiuană Trilha Igarapé Curuá | 1°42’ 50.2"S, 51°27’ 11.4”W | 20–23 November 2003 | A.P. Aguiar and J. Dias | N. Johnson (2008) | Microscopic slide (light microscopy) |
| *Sceliomorpha* sp. 3 | 1♂ | French Guyana | Roura Montagne de Chevaux |  | 1–31 October 2009 |  | O. Popovici (2014) | SEM |
| *Sceliomorpha* sp. 4 | 1♀ | French Guyana | Roura Montagne de Chevaux |  | 24 March 2010 |  | O. Popovici (2014) | SEM |
| *Shreemana* sp. 1 | 1♀ | South Africa | Kwazulu-Natal, Pietermaritzburg Hilton |  | 6–14. iii. 2005 | V. Kolyada | L. Masner (2008) | Microscopic slide (light microscopy) |
| *Shreemana* sp. 1 | 1♀ | South Africa | Kwazulu-Natal, Vemon Crookes | 30°17.4’ S, 30°36.9’ E | 18–20 March 2005 | V. Kolyada | L. Masner (2014) | SEM |
| *Sparasion* sp. 1 | 2♂ | Romania | Iași: Bârnova | 46°59’ 37.0’ ‘ N, 27°35’ 27.1’ ‘ E | 12 July 2007 | O. Popovici and M. Popovici | O. Popovici (2007) | Microscopic slide (light microscopy) |
| *Sparasion* sp. 2 | 1♂ | Romania | Iași: Bârnova | 46°59’ 37.0’ ‘ N, 27°35’ 27.1’ ‘ E | 12 July 2007 | O. Popovici and M. Popovici | O. Popovici (2008) | SEM |
| *Sparasion* sp. 3 | 1♂ and 1♀ | Romania | Iași: Botanical Garden | 47°11’ 10”N, 27°32’ 59”E | 26 July 2007 | O. Popovici | O. Popovici (2007) | Microscopic slide (light microscopy) |
| *Sparasion* sp. 4 | 2♀ and 1♂ | Romania | Constanţa: Agigea | 44°05’ 11,1’ ‘ N, 28°38’ 31’ ‘ E | 27–29 July 2008 | O. Popovici and M. Popovici | O. Popovici (2008) | Microscopic slide (light microscopy) |
| *Sparasion* sp. 5 | 3♂ and 7♀ | Romania | Constanţa: Agigea | 44°05’ 11,1’ ‘ N; 28°38’ 31’ ‘ E | 28–29 July 2008 | O. Popovici and M. Popovici | O. Popovici (2009) | Microscopic slide (light microscopy) |
| *Sparasion* sp. 6 | 1♀ | Romania | Tulcea: Babadag | 44°48’ 49’ ‘ N, 28°42’ 24.6’ ‘ E | 6–7 July 2009 | O. Popovici and L. Fusu | O. Popovici (2009) | SEM |
| *Sparasion* sp. 7 | 1♀ | Romania | Tulcea: Babadag | 44°48’ 49’ ‘ N, 28°42’ 24.6’ ‘ E | 6–7 July 2010 | O. Popovici and L. Fusu | O. Popovici (2010) | SEM |
| *Sparasion* sp. 8 | 1♀ | Romania | Tulcea: Babadag | 44°48’ 49’ ‘ E, 28°42’ 24.6’ ‘ E | 6–7 July 2011 | O. Popovici and L. Fusu | O. Popovici (2011) | Microscopic slide (light microscopy) |
| *Sparasion* sp. 9 | 2♀ | Greece | Kerkini Lake, N.P. Lithotopos |  | 1–7 August 2006 | G. Ramel | O. Popovici (2009) | Microscopic slide (light microscopy) |
| *Sparasion* sp. 10 | 1♂ and 1♀ | Japan | Kitahira, Otsu-shi Shiga-ken |  | 19–22 July 2008 | T. Yoshida | O. Popovici (2009) | Microscopic slide (light microscopy) |
| *Sparasion* sp. 11 | 1♂ | Uganda | Kibale, N.P. Kanyawara Biol. Station |  | 14–21 November 2010 | S. Katusabe and Co | O. Popovici (2009) | Microscopic slide (light microscopy) |
| *Spiniteleia campbelli* Masner | 1♀ | USA | NC: Northampton Co. 7km S Jackson |  | ?.viii–? September 1987 | BRC HYM Team | L. Masner (2008) | Microscopic slide (light microscopy) |
| *Spiniteleia* sp. 1 | 1♀ | USA | Santa Cruz Co Patagonia | 31°58’ N, 110°77’ W | 24 June 1994 | E. Wilke and B. Brown | L. Masner (2014) | SEM |
| *Styloteleia* sp. 1 | 1♀ | Fiji | Taveuni, Cakaudrove Prov., 5.3 km SE Tavuki Vlg., Mt. Devo | 16.841S, 179.968W | 20–27 December 2002 | Schlinger and Tokota | L. Masner (2008) | Microscopic slide (light microscopy) |
| *Styloteleia* sp. 2 | 1♀ | Papua New Guinea | Anwar |  | 12 October 1982 | P. Grootaert | L. Masner (2014) | SEM |
| *Styloteleia* sp. 3 | 1♂ | Australia | Queensland Cairns, Bramston beach |  | 1 August 2012 | P. Tripotin | O. Popovici (2014) | SEM |
| *Synoditella bisulcata* (Kieffer) | 1♀ | Canada | ON, Copper Cliff |  | 26 August 1996 | D. Shorthouse and L. Dumas | L. Masner (2008) | Microscopic slide (light microscopy) |
| *Synoditella bisulcata* (Kieffer) | 1♀ | Canada | ON, Copper Cliff |  | 19 August 1996 | D. Shorthouse and L. Dumas | L. Masner (2014) | SEM |
| *Tanaodytes* sp. 1 | 1♀ | Papua New Guinea | East New Britain, Bainings Mts. DPI Base Camp | 4°26.36’ S, 151°49.02’ E | 27 May –30 June 1999 | A. Mararuai and M. Kalamen | L. Masner (2009) | Microscopic slide (light microscopy) |
| *Tanaodytes* sp. 2 | 1♂ | Malaysia | Selangor, Univ. Malaya, Field Station | 3°19’ 30”N, 101°45’ 12”E | 6–9 September 2001 | J. Heraty | L. Masner (2014) | SEM |
| *Teleas* sp. 1 | 1♂ | Romania | Iași: Valea lui David | 47°11’ 34.58”N, 27°28’ 05.55”E | 2 October 1999 | L. Fusu | O. Popovici (2008) | Microscopic slide (light microscopy) |
| *Teleas* sp. 2 | 1♂ | Romania | Botoșani: Ipotesti |  | 17 June 2006 | C. Lisenchi | O. Popovici (2008) | Microscopic slide (light microscopy) |
| *Teleas* sp. 2 | 6♂ and 2♀ | Romania | Constanţa: Agigea | 44°5’ 11.1”N, 28°38’ 31.0”E | 12–13 June 2008 | E. Morariu | O. Popovici (2008) | Microscopic slide (light microscopy) |
| *Teleas* sp. 2 | 2♂ | Romania | Botosani, Dorohoi, Sendriceni |  | 18–19 July 2012 | A. Moruzi | O. Popovici (2014) | SEM |
| *Teleas* sp. 3 | 1♂ | Romania | Botosani, Dorohoi, Sendriceni |  | 18–19 July 2012 | A. Moruzi | O. Popovici (2014) | SEM |
| *Teleas* (*Proteleas*) sp. | 1♂ | Romania | Botoșani: Leorda | 47°49’ 25,31”N, 26°24’ 28.39”E | 1 May 2005 | O. Popovici | O. Popovici (2008) | Microscopic slide (light microscopy) |
| *Telenomus* sp. 1 | 1♀ and 1♂ | Romania | Tulcea: Babadag |  | 13–15 August 2012 | O. Popovici | O. Popovici (2014) | SEM |
| *Telenomus turesis*Walker | 14♀ and 15♂ | Romania | Botoșani: Vorona |  | 10 May 2007 | C. Lisenchi | O. Popovici (2008) | Microscopic slide (light microscopy) |
| *Telenomus* (*Platytelenomus*) sp. 1 | 1♀ | Romania | Tulcea: Caraorman |  | 26 June 2000 | M. Mitroiu | O. Popovici (2008) | Microscopic slide (light microscopy) |
| *Telenomus* (*Platytelenomus*) sp. 1 | 1♀ | Romania | Iași: Bârnova | 46°59’ 06.6”N, 27°35’ 04.5”E | 1 June 2005 | O. Popovici | O. Popovici (2008) | Microscopic slide (light microscopy) |
| *Telenomus* (*Platytelenomus*) sp. 1 | 1♀ | Romania | Iași: Bârnova | 46°59’ 06.6”N, 27°35’ 04.5”E | 22 July 2005 | O. Popovici | O. Popovici (2008) | Microscopic slide (light microscopy) |
| *Thoron metallicus* Haliday | 4♀ | Romania | Iași: Ciric | 47°14’ 35.99”N, 27°34’ 45.37”E | 23 June 2007 | O. Popovici and I. Moglan | O. Popovici (2008) | Microscopic slide (light microscopy) |
| *Thoron metallicus* Haliday | 1♀ | Romania | Iași: Botanical Garden | 47°11’ 10”N, 27°32’ 59”E | 28 July 2006 | O. Popovici | O. Popovici (2008) | Microscopic slide (light microscopy) |
| *Thoron metallicus* Haliday | 1♀ | Romania | Iași: Ciric | 47°14’ 35.99”N, 27°34’ 45.37”E | 4 September 2007 | O. Popovici | O. Popovici (2014) | SEM |
| *Thoronella* sp. 1 | 1♀ | Canada | PQ: Lac Jean-Venne | 45°41’ N, 76°03’ W | 14–21 August 1995 | Masner and Denis | L. Masner (2008) | Microscopic slide (light microscopy) |
| *Thoronella* sp. 1 | 1♀ | Canada | PQ: Lac Jean-Venne | 45°41’ N, 76°03’ W | 14–21 August 1995 | Masner and Denis | L. Masner (2014) | SEM |
| *Thoronidea* sp. 1 | 1♀ | Costa Rica | Puntarenas Estacion Biol Monteverde | 10°36” N, 85°15” W | ? February 2007 | J. Noyes | A. Polaszek (2010) | Microscopic slide (light microscopy) |
| *Tiphodytes gerriphagus* (Marchal) | 8♀ and 4♂ | Romania | Iași: Ciric | 47°10’ 17.58”N, 27°36’ 45.94”E | 28 July 2006 | O. Popovici | O. Popovici (2008) | Microscopic slide (light microscopy) |
| *Tiphodytes gerriphagus* (Marchal) | 3♀ and 2♂ | Romania | Iași: Bârnova | 46°59’ 37.0”N, 27°35’ 27.1”E | 15 July 2006 | O. Popovici | O. Popovici (2008) | Microscopic slide (light microscopy) |
| *Tiphodytes gerriphagus* (Marchal) | 2♀ | Bulgaria | Kavarna |  | 25 July 2010 | L. Fusu and M. Dascalu | O. Popovici (2014) | SEM |
| *Tyrannoscelio genieri*Masner, Johnson, and Arias-Penna | 1♀ | Brazil | Esp. Santo Municip. Linhares, 10 m | 19°08’ 50”S, 39°58’ 43”W | 28 January 2000 | F. Genier | Paratype | Microscopic slide (light microscopy) |
| *Tyrannoscelio genieri*Masner, Johnson, and Arias-Penna | 1♂ |  | UFES#01939 |  |  |  | L. Masner (2014) | SEM |
| *Trichoteleia* sp. 1 | 1♂ and 1♀ | Madagascar | MG 35–26, MG 37B–01 |  |  |  | N. Johnson (2010) | Microscopic slide (light microscopy) |
| *Trichoteleia* sp. 2 | 1♀ | Madagascar | Ambanizana Nat. Park | 15°42.20’ S, 49°57.69’ E | 13–19 November 2006 | M. v. Tschirnhaus | O. Popovici (2014) | SEM |
| *Trimorus* sp. 1 | 3♂ | Romania | Tulcea: Letea | 45°19’ 44.9”N, 29°31’ 10.3”E | 26 July 2007 | O. Popovici and L. Fusu | O. Popovici (2008) | Microscopic slide (light microscopy) |
| *Trimorus* sp. 2 | 1♂ | Romania | Iași: Ciric | 47°14’ 35.99”N, 27°34’ 45.37”E | 23 June 2007 | O. Popovici and I. Moglan | O. Popovici (2008) | Microscopic slide (light microscopy) |
| *Trimorus* sp. 3 | 9♂ | Romania | Constanţa: Canaraua Fetii | 44°04’ 39’ ‘ N, 27°38’ 45’ ‘ E | 9 June 2008 | O. Popovici and I. Moglan | O. Popovici (2008) | Microscopic slide (light microscopy) |
| *Trimorus* sp. 4 | 7♂ | Romania | Tulcea: Letea | 45°19’ 44.9”N, 29°31’ 10.3”E | 10 June 2008 | O. Popovici | O. Popovici (2008) | Microscopic slide (light microscopy) |
| *Trimorus* sp. 5 | 2♂ | Romania | Botosani, Dorohoi, Sendriceni |  | 18–19 July 2012 | A. Moruzi | O. Popovici (2014) | SEM |
| *Trissacantha* sp. 1 | 1♂ | USA | Texas, College Station, Like Creek Park |  | 19–20. iv.1989 | J. Noyes | L. Masner (2009) | Microscopic slide (light microscopy) |
| *Trissacantha* sp. 2 | 2♂ | Thailand | Province Chiang Mai, Doi Ithanon Nat. Park |  | 11 March 2003 | M. v. Tschirnhaus | O. Popovici (2014) | SEM |
| *Trissolcus flavipes* (Thomson) | 14♀ | Romania | Iași: Botanical Garden | eggs of Heteroptera | 12 May 2002 | L. Fusu | O. Popovici (2008) | Microscopic slide (light microscopy) |
| *Trissolcus flavipes* (Thomson) | 1♀ | Romania | Iași: Bârnova | 46°59’ 06.6”N, 27°35’ 04.5”E | 21–22 June 2007 | O. Popovici and L. Fusu | O. Popovici (2008) | Microscopic slide (light microscopy) |
| *Trissolcus grandis* (Thomson) | 10♀ | Romania | Iași: Bârnova | 46°59’ 06.6”N, 27°35’ 04.5”E | 21–22 June 2007 | O. Popovici and L. Fusu | O. Popovici (2008) | Microscopic slide (light microscopy) |
| *Trissolcus grandis* (Thomson) | 8♀ and 4♂ | Romania | Iași: Mârzești | 47°14’ 14.78”N, 27°29’ 14.63”E | 15 May 2007 | O. Popovici | O. Popovici (2008) | Microscopic slide (light microscopy) |
| *Trissolcus* sp. 1 | 1♀ and 1♂ | USA | California, Los Angeles County, Los Angeles, Los Feliz | 34.116°N 118.279°W, | 31 August –7 September 2013 | Jeff, Aaron and Jacob Koch | O. Popovici (2014) | SEM |
| *Triteleia* sp. 1 | 1♀ | Costa Rica | Punt Golfo Dulce |  | ?.vi–viii.1989 | P. Hanson | L. Masner (2008) | Microscopic slide (light microscopy) |
| *Triteleia* (*Parapegus*) sp. 1 | 1♀ | Romania | Iași: Bârnova | 46°59’ 37.0”N, 27°35’ 27.1”E | 8 September 2004 | O. Popovici | O. Popovici (2005) | Microscopic slide (light microscopy) |
| *Triteleia* (*Parapegus*) sp. 1 | 1♀ | Romania | Iași: Bârnova | 46°59’ 37.0”N, 27°35’ 27.1”E | 12 August 2010 | M. Popovici | O. Popovici (2010) | Microscopic slide (light microscopy) |
| *Triteleia* (*Parapegus*) sp. 1 | 2♀ | Romania | Iași: Bârnova | 46°59’ 37.0”N, 27°35’ 27.1”E | 27 March 2006 | L. Fusu and M. Dascalu | O. Popovici (2010) | Microscopic slide (light microscopy) |
| *Triteleia* (*Parapegus*) sp. 1 | 1♀ | Romania | Iași: Mârzești | 47°14’ 14.78”N, 27°29’ 14.63”E | 14 February 2006 | L. Fusu and M. Dascalu | O. Popovici (2010) | Microscopic slide (light microscopy) |
| *Triteleia* (*Parapegus*) sp. 1 | 1♀ | Italy | Mandas |  | ? July 1933 |  | O. Popovici (2009) | SEM |
| GenusT | 1♀ |  | OSUC 0213686 |  |  |  | L. Masner (2009) | Microscopic slide (light microscopy) |
| GenusT | 1♀ | Madagascar | Tulear Andohahela Nat Park | 24°49.85’ S, 46°32.17’ E | 7–17 December 2003 | M. Irwin, F. Parker, R. Harin’ Hala | L. Masner (2014) | SEM |
| *Xenomerus* sp. 1 | 6♂ | Romania | Constanţa: Hagieni | 43°47’ 48.47”N, 28°27’ 26.27”E | 11 May 2005 | O. Popovici and L. Fusu | O. Popovici (2008) | Microscopic slide (light microscopy) |
| *Xenomerus* sp. 1 | 2♂ | Romania | Constanţa: Agigea | 44°5’ 11.1” N, 28°38’ 31.0” E | 23 June 2000 | M. Mitroiu | O. Popovici (2008) | Microscopic slide (light microscopy) |
| *Xenomerus* sp. 1 | 1♂ | Romania | Constanţa: Agigea | 44°5’ 11.1”N, 28°38’ 31.0”E | 16 June 2004 | O. Popovici | O. Popovici (2008) | Microscopic slide (light microscopy) |
| *Xenomerus* sp. 1 | 1♂ | Romania | Constanţa: Agigea | 44°5’ 11.1”N, 28°38’ 31.0”E | 28 June 1990 | M. Mitroiu | O. Popovici (2008) | Microscopic slide (light microscopy) |
| *Xenomerus* sp. 1 | 1♂ | Romania | Piatra- Neamt: Crângu |  | 17 May 2005 | O. Popovici | O. Popovici (2008) | Microscopic slide (light microscopy) |
| *Xenomerus* sp. 1 | 1♂ | Romania | Iași: Botanical Garden | 47°11’ 10”N, 27°32’ 59”E | 12 June 2005 | O. Popovici | O. Popovici (2008) | Microscopic slide (light microscopy) |
| *Xenomerus* sp. 1 | 1♂ | Romania | Iași: Botanical Garden | 47°11’ 10”N, 27°32’ 59”E | 11 May 2007 | O. Popovici | O. Popovici (2008) | Microscopic slide (light microscopy) |
| *Xenomerus* sp. 1 | 1♂ | Spain | Vigo |  | 25 October 2005 | L. Fusu | O. Popovici (2008) | Microscopic slide (light microscopy) |
| *Xenomerus* sp. 1 | 1♂ | Greece | Kerkini lake Nat. Park | 41°12’ 48.7”N, 23°6’ 11.9”E | 13–19 June 2007 | G. Ramel | O. Popovici (2008) | Microscopic slide (light microscopy) |
| *Xenomerus* sp. 1 | 1♂ | Greece | Kerkini lake Nat. Park | 47°13’ 32,8”N, 23°5’ 4.2”E | 4 April –10 April 2007 | G. Ramel | O. Popovici (2008) | Microscopic slide (light microscopy) |
| *Xenomerus* sp. 1 | 3♂ | Romania | Constanţa: Canaraua Fetii | 44°04’ 39’ ‘ N, 27°38’ 45’ ‘ E | 9 June 2008 | O. Popovici and I. Moglan | O. Popovici (2008) | Microscopic slide (light microscopy) |
| *Xenomerus* sp. 2 | 2♂ | Costa Rica | Puntarenas Res Priv. Karen Mogensen | 9°52’ ‘ N, 85°03’ W | 19–20 February 2009 | J.S. Noyes | O. Popovici (2014) | SEM |
| *Xentor schlingeri* Masner and Johnson | 1♀ | Fiji | Taveuni Cakaudrove Prov., 5.3km SE Tavuki Vlg., Mt. Devo | 16.841°S, 179.968°W | 27 December 2002–3 January 2003 | Schlinger and Tokota’a | Paratype | Microscopic slide (light microscopy) |
| *Xentor schlingeri* Masner and Johnson | 1♀ | Fiji | Vanua Levu, Bua Prov. Batiquere range, 6km NW Kilaka | 16.811S, 178.988E | 3–10 June 2004 | Schlinger and Tokota’a | Paratype | SEM |
| GenusX | 1♂ and 1♀ | China | Guangdong Nan Kun Shan | 23°37.287’ N, 113°51.267’ E | 29–31 November 2009 | L. Masner et al. | L. Masner (2011) | Microscopic slide (light microscopy) |
| GenusX | 1♀ | China | Guangdong Nan Kun Shan | 23°37.287’ N, 113°51.267’ E | 29–31 November 2009 | L. Masner et al. | L. Masner (2014) | SEM |
| *Yunkara* sp. | 1♀ | Papua New Guinea | Madang Wanang River | 5°13’ 39’ ‘ , 145°04’ 45’ ‘ E | 22–23 November 2013 | C. Villemant | L. Masner (2014) | Microscopic slide (light microscopy) |
